# Supplementary material
Source: HighWire-hosted journal article supplement (http://adc.bmjjournals.com/highwire/filestream/186711/field_highwire_adjunct_files/0/928678webonlyfig1.pdf)
Supplement: 928678webonlyfig1.pdf [file 928678webonlyfig1.pdf]

| <b>date</b>                        | <b>20.5.03</b> | <b>27.10.03</b> |
|------------------------------------|----------------|-----------------|
| <b>A. Child's PAQLQ(S) score</b>   |                |                 |
| Total score (mean)                 | 3.2            | 6.5             |
| Limitations                        | 2.2            | 6               |
| Symptoms                           | 5.2            | 6.5             |
| Emotional                          | 3.6            | 7               |
| <b>B. Mother's PACQLQ score</b>    |                |                 |
| Total score (mean)                 | 4.2            | 6.5             |
| Limitations                        | 5.2            | 7               |
| Emotional                          | 3.2            | 6               |
| <b>C. Spirometry (% predicted)</b> |                |                 |
| FEV1                               | 86             | 90              |
| FEF25-75                           | 79             | 85              |
| <b>D. Asthma severity score</b>    |                |                 |
|                                    | 1              | 1               |
